# Supplementary material for: Clinical care pathway to detect advanced liver disease in patients with type 2 diabetes through automated fibrosis score calculation and electronic reminder messages: a randomised controlled trial
Source: PubMed Central journal article supplement — Gut. 2023 Aug 7;72(12):2364–71. doi: 10.1136/gutjnl-2023-330269 (PMC10715546; doi:10.1136/gutjnl-2023-330269), 2023-08-07
Supplement: gutjnl-2023-330269supp001.pdf [file gutjnl-2023-330269supp001.pdf]

## Supplementary material

### **A clinical care pathway to detect advanced liver disease in patients with type 2 diabetes through automated fibrosis score calculation and electronic reminder messages: A randomised controlled trial**

Xinrong Zhang<sup>1-3\*</sup>, Terry Cheuk-Fung Yip<sup>1-3\*</sup>, Grace Lai-Hung Wong<sup>1-3</sup>, Wei-Xuan Leow<sup>4</sup>, Lilian Yan Liang<sup>1-3</sup>, Lee-Ling Lim<sup>3,5</sup>, Guanlin Li<sup>1-3</sup>, Luqman Ibrahim<sup>5</sup>, Huapeng Lin<sup>1-3</sup>, Jimmy Che-To Lai<sup>1-3</sup>, Angel Mei-Ling Chim<sup>1-3</sup>, Henry Lik-Yuen Chan<sup>6,7</sup>, Alice Pik-Shan Kong<sup>3</sup>, Wah-Kheong Chan<sup>4\*\*</sup>, Vincent Wai-Sun Wong<sup>1-3\*\*</sup>

<sup>1</sup>Medical Data Analytics Centre, The Chinese University of Hong Kong, Hong Kong, China

<sup>2</sup>State Key Laboratory of Digestive Disease, Institute of Digestive Disease, The Chinese University of Hong Kong, Hong Kong, China

<sup>3</sup>Department of Medicine and Therapeutics, The Chinese University of Hong Kong, Hong Kong, China

<sup>4</sup>Gastroenterology and Hepatology Unit, Department of Medicine, Faculty of Medicine, University of Malaya, Kuala Lumpur, Malaysia

<sup>5</sup>Endocrinology Unit, Department of Medicine, Faculty of Medicine, University of Malaya, Kuala Lumpur, Malaysia

<sup>6</sup>Faculty of Medicine, The Chinese University of Hong Kong, Hong Kong, China

<sup>7</sup>Union Hospital, Hong Kong

\*Co-first authors

\*\*Co-corresponding authors

**Supplementary Figure 1: Distribution of (A) Fibrosis-4 index (FIB-4) and (B) aspartate aminotransferase-to-platelet ratio index (APRI) in the intervention and control groups**

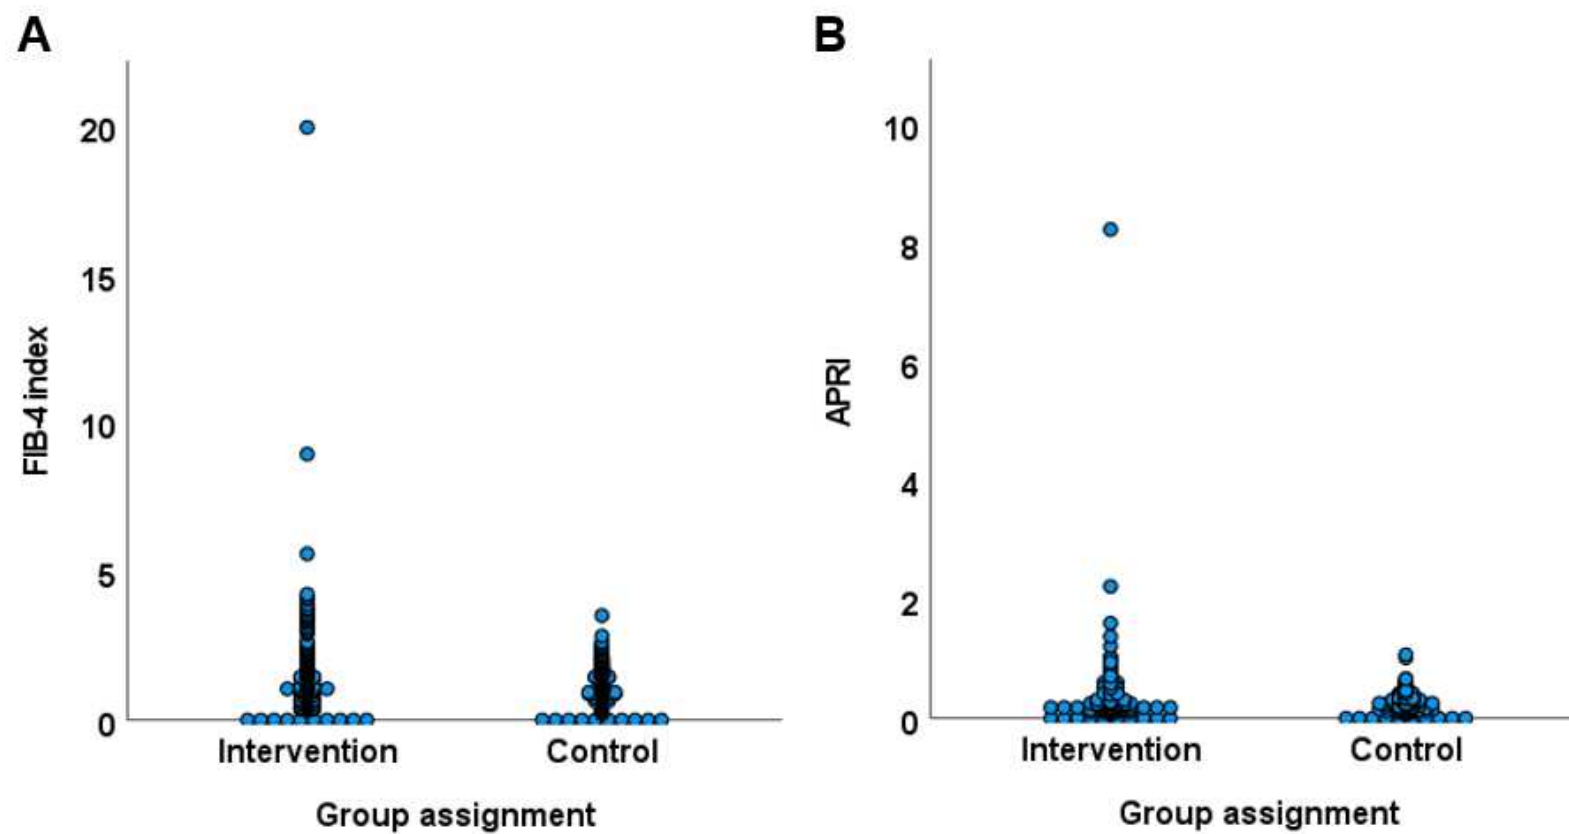

**Supplementary Table 1: Changes in FIB-4 at a median interval of 1 year in a separate cohort of 8700 patients with NAFLD**

| Baseline FIB-4  | <1.3 | 1.3-2.66 | ≥2.67 |
|-----------------|------|----------|-------|
| Follow-up FIB-4 |      |          |       |
| <1.3            | 4230 | 740      | 32    |
| 1.3-2.66        | 608  | 1912     | 297   |
| ≥2.67           | 56   | 319      | 506   |

**Supplementary Table 2: Factors associated with hepatology referral or further fibrosis assessment in the intervention group**

| Factors                                                              | Univariate analysis |              |         | Multivariable analysis |              |         |
|----------------------------------------------------------------------|---------------------|--------------|---------|------------------------|--------------|---------|
|                                                                      | Odds ratio          | 95% CI       | p value | Odds ratio             | 95% CI       | p value |
| Age, years                                                           | 1.012               | 0.977-1.048  | 0.52    |                        |              |         |
| Female sex                                                           | 1.143               | 0.659-1.980  | 0.63    |                        |              |         |
| Hong Kong (vs Malaysia)                                              | 4.195               | 0.998-17.627 | 0.050   | 2.020                  | 0.406-10.046 | 0.39    |
| Diabetes clinic (vs general medical clinic)                          | 1.222               | 0.686-2.177  | 0.50    |                        |              |         |
| Current smoker (vs ex-smoker and non-smoker)                         | 0.523               | 0.183-1.498  | 0.23    |                        |              |         |
| Current drinker (vs ex-drinker and non-drinker)                      | 2.309               | 1.243-4.289  | 0.008   | 1.768                  | 0.853-3.665  | 0.13    |
| Body mass index, kg/m <sup>2</sup>                                   | 0.974               | 0.917-1.034  | 0.39    |                        |              |         |
| Waist circumference, cm                                              | 0.989               | 0.965-1.012  | 0.34    |                        |              |         |
| Laboratory parameters                                                |                     |              |         |                        |              |         |
| Creatinine, µmol/L                                                   | 1.003               | 0.998-1.007  | 0.26    |                        |              |         |
| Estimated glomerular filtration rate, mL/min per 1.73 m <sup>2</sup> | 0.992               | 0.981-1.003  | 0.15    |                        |              |         |
| Albumin, g/L                                                         | 1.016               | 0.948-1.088  | 0.66    |                        |              |         |
| Bilirubin, µmol/L                                                    | 0.982               | 0.930-1.037  | 0.51    |                        |              |         |
| Alanine aminotransferase, U/L                                        | 1.020               | 1.008-1.033  | 0.001   |                        |              |         |
| Aspartate aminotransferase, U/L                                      | 1.046               | 1.027-1.065  | <0.001  |                        |              |         |
| Gamma-glutamyl transpeptidase, U/L                                   | 1.001               | 0.999-1.002  | 0.48    |                        |              |         |
| Fasting plasma glucose, mmol/L                                       | 1.013               | 0.901-1.139  | 0.83    |                        |              |         |
| Haemoglobin A <sub>1c</sub> , %                                      | 0.928               | 0.744-1.159  | 0.51    |                        |              |         |
| Total cholesterol, mmol/L                                            | 0.992               | 0.721-1.365  | 0.96    |                        |              |         |
| HDL-cholesterol, mmol/L                                              | 1.007               | 0.455-2.228  | 0.99    |                        |              |         |
| LDL-cholesterol, mmol/L                                              | 0.850               | 0.575-1.257  | 0.42    |                        |              |         |
| Triglycerides, mmol/L                                                | 1.137               | 0.919-1.406  | 0.24    |                        |              |         |
| Platelet count, ×10 <sup>9</sup> /L                                  | 0.985               | 0.980-0.990  | <0.001  | 1.000                  | 0.994-1.007  | 0.96    |
| Positive hepatitis B surface antigen                                 | 1.204               | 0.348-4.169  | 0.77    |                        |              |         |

|                                                                                 |        |                |        |        |                |        |
|---------------------------------------------------------------------------------|--------|----------------|--------|--------|----------------|--------|
| Abnormal fibrosis-4 index or aspartate aminotransferase-to-platelet ratio index | 91.500 | 21.965-381.161 | <0.001 | 84.333 | 18.728-379.745 | <0.001 |
|---------------------------------------------------------------------------------|--------|----------------|--------|--------|----------------|--------|

HDL = high-density lipoprotein; LDL = low-density lipoprotein.

**Supplementary Table 3: Factors associated with hepatology referral or further fibrosis assessment for patients with abnormal fibrosis-4 index or aspartate aminotransferase-to-platelet ratio index in the intervention group**

| Factors                                                              | Univariate analysis |              |         | Multivariable analysis |             |         |
|----------------------------------------------------------------------|---------------------|--------------|---------|------------------------|-------------|---------|
|                                                                      | Odds ratio          | 95% CI       | p value | Odds ratio             | 95% CI      | p value |
| Age, years                                                           | 0.991               | 0.940-1.044  | 0.73    |                        |             |         |
| Female sex                                                           | 1.843               | 0.950-3.574  | 0.070   | 2.597                  | 1.125-5.997 | 0.025   |
| Current smoker (vs ex-smoker and non-smoker)                         | 0.585               | 0.181-1.887  | 0.37    |                        |             |         |
| Current drinker (vs ex-drinker and non-drinker)                      | 1.896               | 0.901-3.989  | 0.092   | 3.633                  | 1.449-9.109 | 0.006   |
| Hong Kong (vs Malaysia)                                              | 4.235               | 0.516-34.755 | 0.18    |                        |             |         |
| Diabetes clinic (vs general medical clinic)                          | 2.1898              | 1.041-4.602  | 0.039   | 2.484                  | 1.070-5.763 | 0.034   |
| Body mass index, kg/m <sup>2</sup>                                   | 0.962               | 0.899-1.030  | 0.27    |                        |             |         |
| Waist circumference, cm                                              | 0.985               | 0.960-1.011  | 0.26    |                        |             |         |
| Laboratory parameters                                                |                     |              |         |                        |             |         |
| Creatinine, µmol/L                                                   | 1.000               | 0.993-1.007  | 0.98    |                        |             |         |
| Estimated glomerular filtration rate, mL/min per 1.73 m <sup>2</sup> | 0.992               | 0.977-1.006  | 0.27    |                        |             |         |
| Albumin, g/L                                                         | 1.017               | 0.926-1.117  | 0.72    |                        |             |         |
| Bilirubin, µmol/L                                                    | 0.912               | 0.846-0.984  | 0.018   | 0.925                  | 0.852-1.003 | 0.059   |
| Alanine aminotransferase, U/L                                        | 1.005               | 0.995-1.016  | 0.34    |                        |             |         |
| Aspartate aminotransferase, U/L                                      | 1.009               | 0.993-1.025  | 0.28    |                        |             |         |
| Gamma-glutamyl transpeptidase, U/L                                   | 0.999               | 0.997-1.002  | 0.67    |                        |             |         |
| Fasting plasma glucose, mmol/L                                       | 1.054               | 0.921-1.206  | 0.44    |                        |             |         |
| Haemoglobin A <sub>1c</sub> , %                                      | 1.126               | 0.846-1.500  | 0.42    |                        |             |         |
| Total cholesterol, mmol/L                                            | 1.154               | 0.804-1.657  | 0.44    |                        |             |         |
| HDL-cholesterol, mmol/L                                              | 0.784               | 0.334-1.838  | 0.58    |                        |             |         |
| LDL-cholesterol, mmol/L                                              | 0.960               | 0.619-1.491  | 0.86    |                        |             |         |
| Triglycerides, mmol/L                                                | 1.866               | 1.211-2.875  | 0.005   | 2.116                  | 1.314-3.406 | 0.002   |
| Platelet count, ×10 <sup>9</sup> /L                                  | 1.001               | 0.994-1.007  | 0.83    |                        |             |         |

|                                      |       |             |      |  |  |  |
|--------------------------------------|-------|-------------|------|--|--|--|
| Positive hepatitis B surface antigen | 0.654 | 0.128-3.352 | 0.61 |  |  |  |
|--------------------------------------|-------|-------------|------|--|--|--|

HDL = high-density lipoprotein; LDL = low-density lipoprotein.
